# Supplementary material
Source: PubMed Central journal article supplement (PMC2737557)

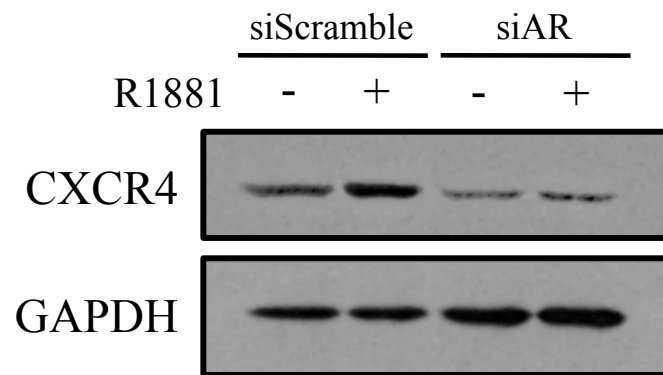

Supplement: me.2009-0010_1.pdf [file me.2009-0010_1.pdf]

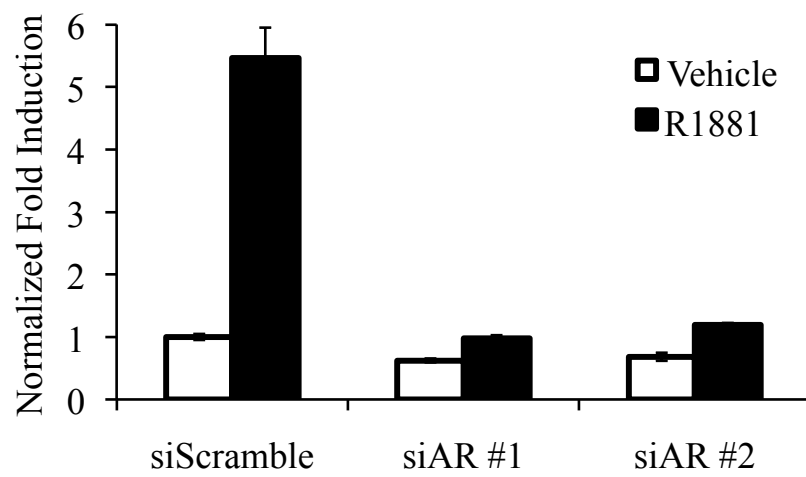

Supplement: me.2009-0010_2.pdf [file me.2009-0010_2.pdf]

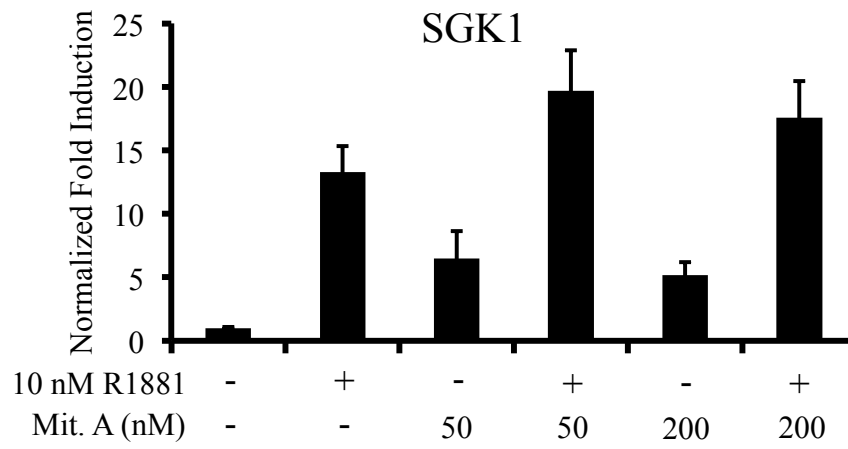

Supplement: me.2009-0010_3.pdf [file me.2009-0010_3.pdf]

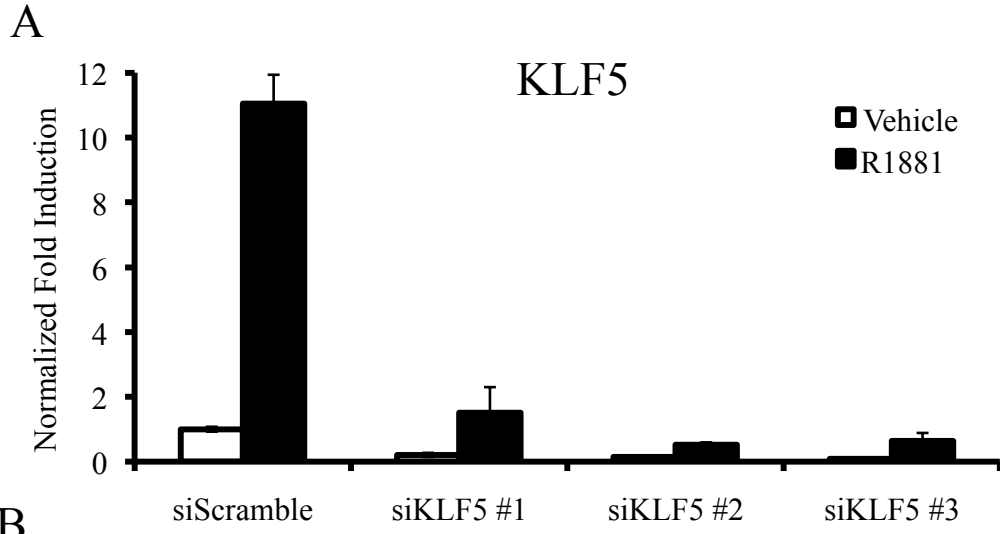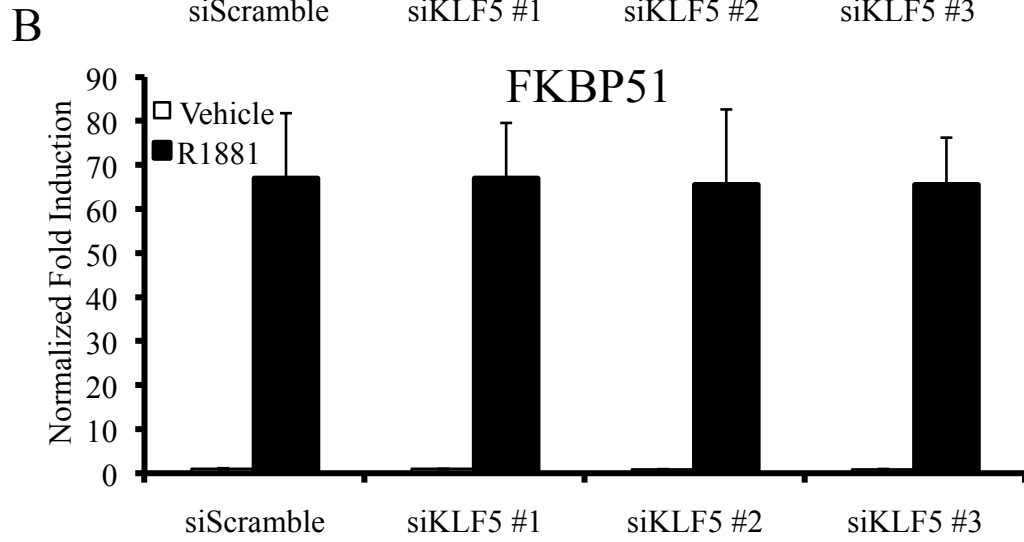

Supplement: me.2009-0010_4.pdf [file me.2009-0010_4.pdf]
